# Supplementary material
Source: PubMed Central journal article supplement (PMC7020817)
Supplement: NIHMS1065961-supplement-1.pdf [file NIHMS1065961-supplement-1.pdf]

| Sample | Reads | Good's Coverage | Time Point | Maternal Diet | Sample | Reads | Good's Coverage | Time Point | Maternal Diet |
|--------|-------|-----------------|------------|---------------|--------|-------|-----------------|------------|---------------|
| 1      | 35553 | 0.999729        | Maternal   | Control       | 29     | 38549 | 0.999549        | 3 years    | Control       |
| 2      | 33301 | 0.999689        | Maternal   | Control       | 30     | 32309 | 0.999719        | Maternal   | High-fat      |
| 3      | 37438 | 0.999734        | Maternal   | Control       | 31     | 37141 | 0.999649        | Maternal   | High-fat      |
| 4      | 39889 | 0.999489        | Maternal   | Control       | 32     | 30245 | 0.999875        | Maternal   | High-fat      |
| 5      | 32941 | 0.999789        | Maternal   | Control       | 33     | 41645 | 0.999669        | Maternal   | High-fat      |
| 6      | 37338 | 0.999714        | Maternal   | Control       | 34     | 30077 | 0.999814        | Maternal   | High-fat      |
| 7      | 45089 | 0.999022        | Maternal   | Control       | 35     | 27879 | 0.999885        | Maternal   | High-fat      |
| 8      | 39376 | 0.999499        | Maternal   | Control       | 36     | 36425 | 0.999709        | Maternal   | High-fat      |
| 9      | 35075 | 0.999704        | Maternal   | Control       | 37     | 32461 | 0.999835        | Maternal   | High-fat      |
| 10     | 31163 | 0.999729        | Maternal   | Control       | 38     | 39795 | 0.999689        | Maternal   | High-fat      |
| 11     | 36057 | 0.999494        | Maternal   | Control       | 39     | 35405 | 0.999719        | Maternal   | High-fat      |
| 12     | 39153 | 0.999524        | Maternal   | Control       | 40     | 37173 | 0.999574        | 1 year     | High-fat      |
| 13     | 26592 | 0.999845        | Maternal   | Control       | 41     | 42185 | 0.999388        | 1 year     | High-fat      |
| 14     | 40965 | 0.999433        | 1 year     | Control       | 42     | 38219 | 0.999438        | 1 year     | High-fat      |
| 15     | 33404 | 0.999769        | 1 year     | Control       | 43     | 42723 | 0.999589        | 1 year     | High-fat      |
| 16     | 35550 | 0.999604        | 1 year     | Control       | 44     | 36125 | 0.999308        | 1 year     | High-fat      |
| 17     | 40240 | 0.999539        | 1 year     | Control       | 45     | 43104 | 0.999363        | 1 year     | High-fat      |
| 18     | 38256 | 0.999544        | 1 year     | Control       | 46     | 39444 | 0.999714        | 6 months   | High-fat      |
| 19     | 27033 | 0.999865        | 1 year     | Control       | 47     | 34364 | 0.999784        | 6 months   | High-fat      |
| 20     | 40826 | 0.999479        | 6 months   | Control       | 48     | 33563 | 0.999734        | 6 months   | High-fat      |
| 21     | 43374 | 0.999318        | 6 months   | Control       | 49     | 34087 | 0.999699        | 6 months   | High-fat      |
| 22     | 34151 | 0.999814        | 6 months   | Control       | 50     | 39221 | 0.999684        | 6 months   | High-fat      |
| 23     | 37657 | 0.999840        | 6 months   | Control       | 51     | 35687 | 0.999699        | 6 months   | High-fat      |
| 24     | 32693 | 0.999549        | 6 months   | Control       | 52     | 44201 | 0.999288        | 3 years    | High-fat      |
| 25     | 32659 | 0.999804        | 6 months   | Control       | 53     | 36805 | 0.999368        | 3 years    | High-fat      |
| 26     | 41291 | 0.999423        | 3 years    | Control       | 54     | 28862 | 0.999774        | 3 years    | High-fat      |
| 27     | 38236 | 0.999749        | 3 years    | Control       | 55     | 37994 | 0.999499        | 3 years    | High-fat      |
| 28     | 41257 | 0.999504        | 3 years    | Control       |        |       |                 |            |               |

**Supplemental Table 1. Quality of sequences by read count and Good's Coverage.**

| Maternal Characteristics | Offspring Age |                |          | High versus Low <i>Treponema</i> Relative Abundance |                      |          |
|--------------------------|---------------|----------------|----------|-----------------------------------------------------|----------------------|----------|
|                          | 6 & 13 months | 36 months      | <i>p</i> | High <i>Treponema</i>                               | Low <i>Treponema</i> | <i>p</i> |
| Maternal age             | 11.2 (± 2.4)  | 9.9 (±2.7)     | 0.18     | 10.7 (± 2.6)                                        | 11.2 (± 2.4)         | 0.50     |
| Maternal parity          | 3.8 (±2.2)    | 3.5 (±1.1)     | >0.99    | 4.0 (± 1.9)                                         | 3.4 (± 2.0)          | 0.38     |
| Maternal weight          | 11.1 (± 1.4)  | 10.0 (± 2.4)   | 0.17     | 10.7 (± 2.1)                                        | 10.9 (± 1.2)         | 0.75     |
| Maternal lean mass       | 66.4% (± 5.5) | 75.1% (± 10.2) | 0.11     | 70.1% (± 8.7)                                       | 66.4% (± 5.5)        | 0.45     |
| Maternal fat mass        | 29.5% (± 5.9) | 20.7% (± 10.8) | 0.11     | 25.8% (± 9.2)                                       | 29.5% (± 5.9)        | 0.45     |

**Supplemental Table 2. Absence of a significant association between maternal characteristics with offspring age and DMM cluster.**

Maternal (dam) weight and body mass were measured just prior to pregnancy, and association with offspring age and relative *Treponema* abundance was determined. Significance (*p*) was determined using Mann-Whitney.
