# Supplementary material
Source: PubMed Central journal article supplement (PMC7020817)

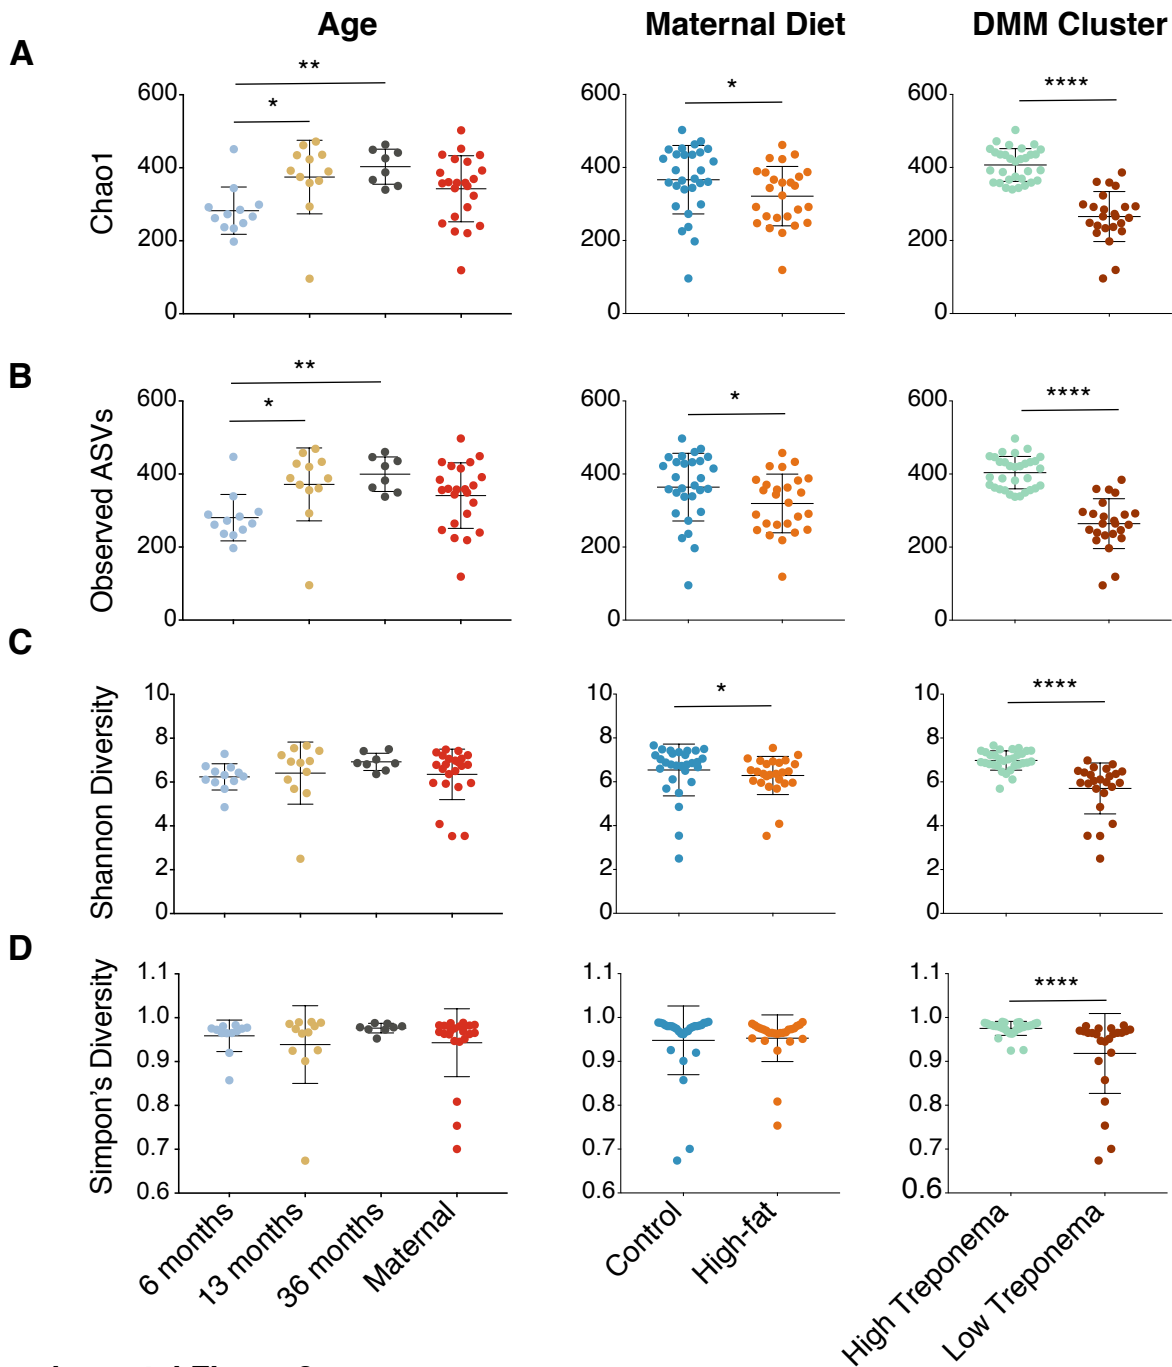

**Supplemental Figure 2**

Supplement: NIHMS1065961-supplement-Suppl_Figure_2.pdf [file NIHMS1065961-supplement-Suppl_Figure_2.pdf]

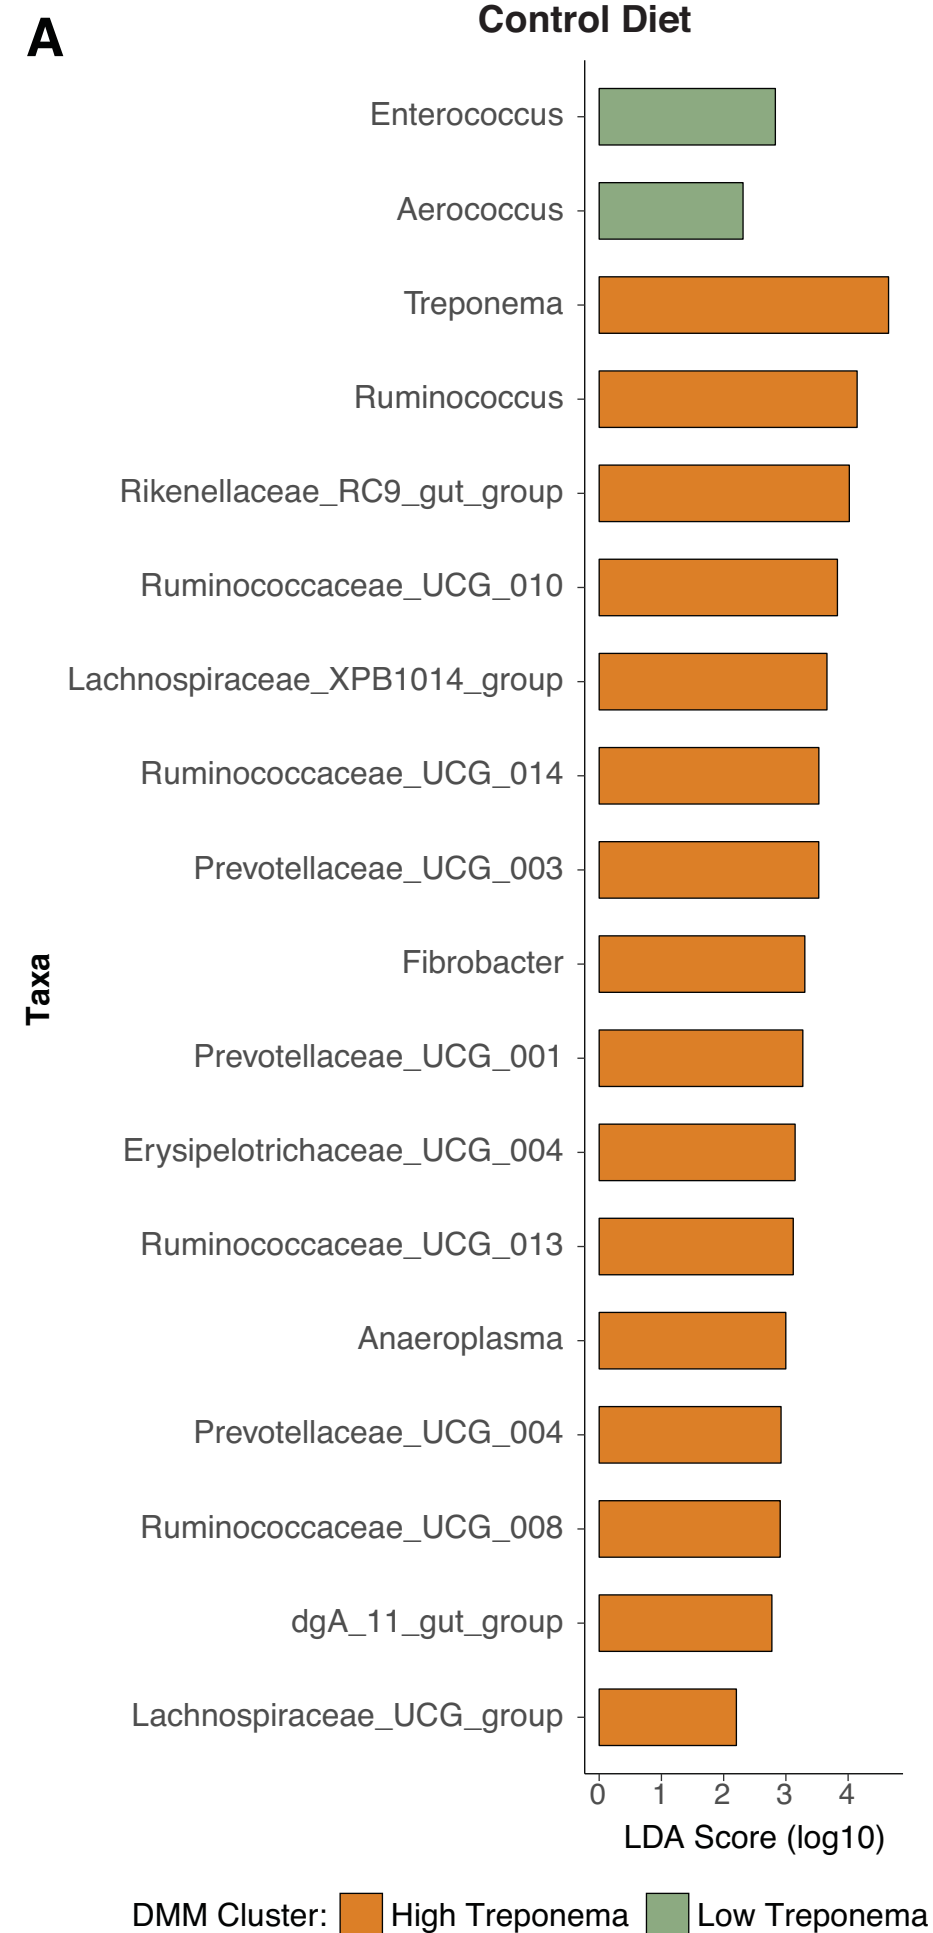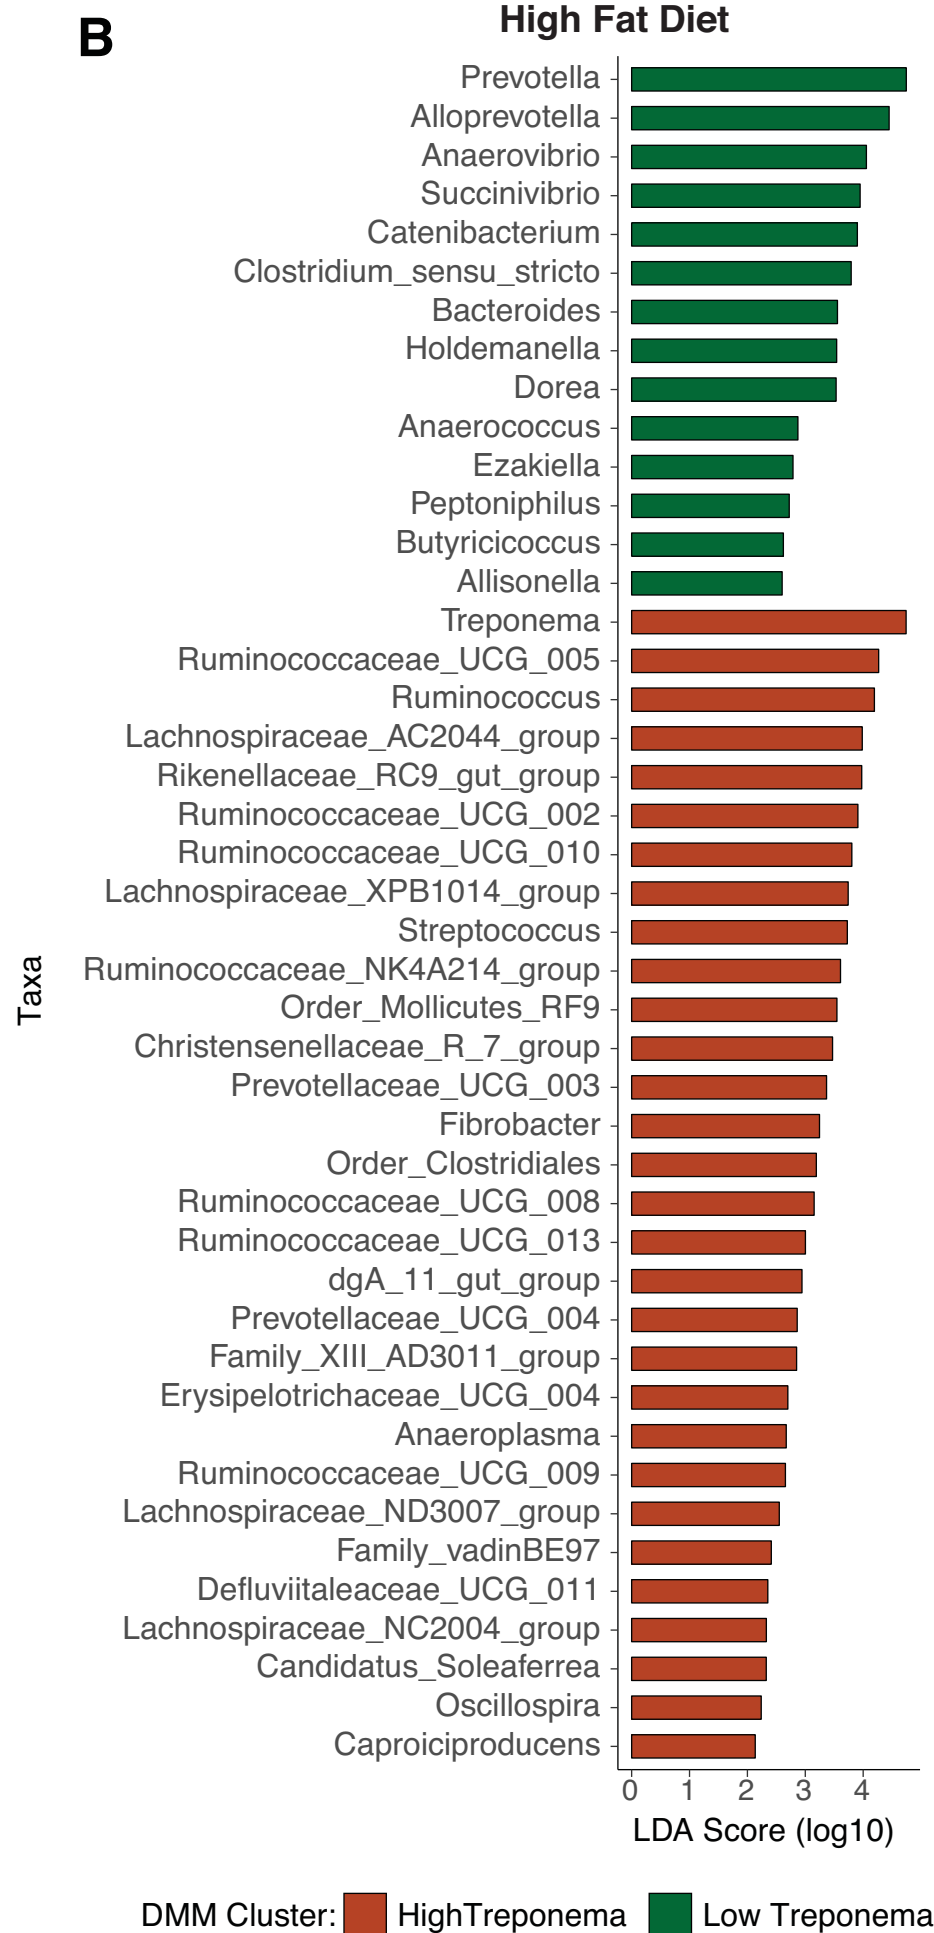

**Supplemental Figure 3**

Supplement: NIHMS1065961-supplement-Suppl_fig_3.pdf [file NIHMS1065961-supplement-Suppl_fig_3.pdf]

**A**

## Binary Jaccard MDS

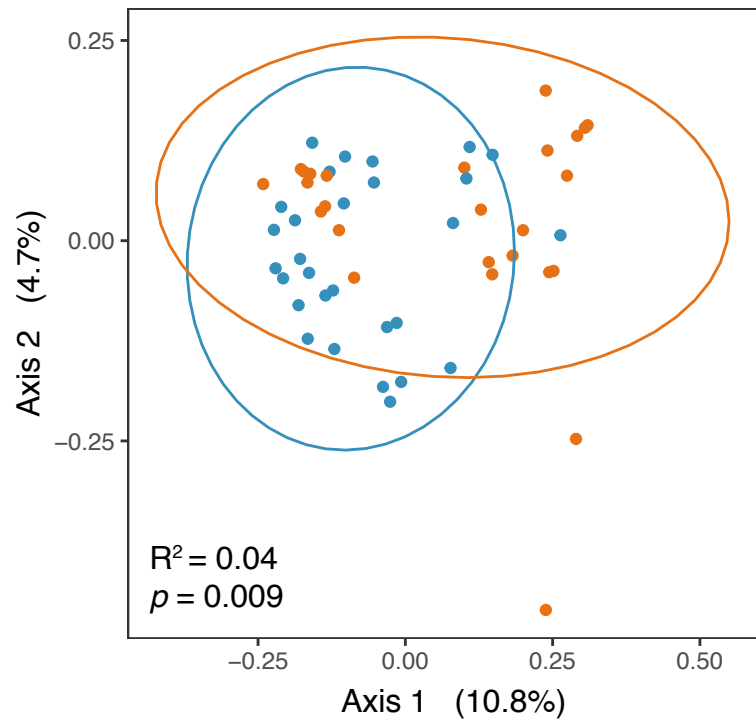**B**

## Binary Jaccard MDS

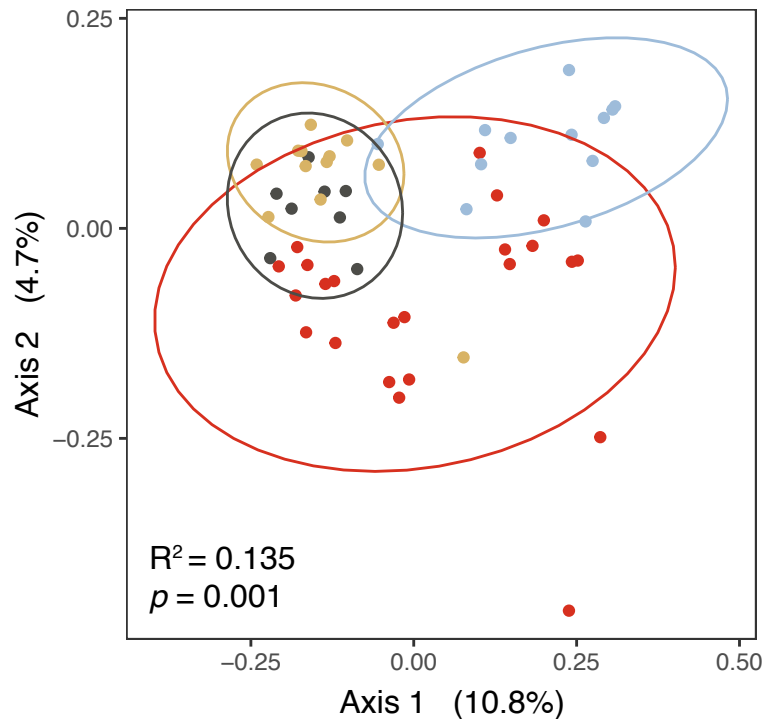

Supplement: NIHMS1065961-supplement-Suppl_figure_1.pdf [file NIHMS1065961-supplement-Suppl_figure_1.pdf]
